# Supplementary material for: Limited Genetic Connectivity between Gorgonian Morphotypes along a Depth Gradient
Source: PLoS One. 2016 Aug 4;11(8):e0160678. doi: 10.1371/journal.pone.0160678 (PMC4973999; doi:10.1371/journal.pone.0160678)
Supplement: S1 Dataset — The allele sizes in 6 loci studied in 13 E. singularis populations. (XLS) [file pone.0160678.s001.xls]

## Sheet: genetixallCCR.gtx
Population	C21		C30		C40		EVER1		EVER3		EVER9
CCR1	190	196	192	200	291	291	245	245	174	182	116	116
CCR1	190	196	200	200	291	294	241	245	174	182	108	108
CCR1	196	199	200	200	291	291	245	257	174	182	108	116
CCR1	196	196	188	192	291	291	241	257	182	182	108	108
CCR1	196	199	188	200	291	291	245	245	182	182	108	116
CCR1	196	196	192	200	291	291	245	245	174	178	108	112
CCR1	199	199	200	200	285	291	245	245	178	182	104	116
CCR1	190	199	188	200	285	291	245	245	178	178	108	108
CCR1	196	199	192	192	291	291	241	257	174	182	104	116
CCR1	199	199	200	200	285	285	245	245	178	182	108	116
CCR1	196	199	192	200	291	291	245	245	178	178	108	116
CCR1	196	199	200	200	285	291	245	245	174	178	108	108
CCR1	196	199	200	204	291	291	245	245	178	182	108	108
CCR1	196	199	200	200	285	291	245	257	182	182	108	108
CCR1	199	199	188	200	291	306	241	241	182	182	116	116
CCR1	196	196	192	200	285	291	245	245	182	182	108	116
CCR1	196	199	200	200	291	291	245	257	178	178	112	116
CCR1	199	199	200	200	291	291	245	249	174	178	108	108
CCR1	190	199	180	180	285	291	245	245	178	178	108	116
CCR1	196	199	188	200	285	291	257	257	178	178	116	116
CCR1	199	199	200	200	291	291	241	257	174	178	116	116
CCR1	199	199	200	200	285	291	241	245	0	0	104	120
CCR1	196	199	188	200	291	291	245	249	174	178	108	116
CCR1	196	199	192	192	291	291	257	257	182	194	104	116
CCR1	184	184	200	200	291	291	245	245	182	194	108	116
CCR1	196	196	192	200	291	291	237	241	182	182	108	116
CCR1	196	199	192	200	291	291	241	245	178	182	108	116
CCR1	190	205	200	200	285	285	245	245	182	182	108	116
CCR1	196	199	192	200	291	291	245	249	182	182	116	116
CCR1	199	199	188	200	291	291	245	245	174	178	108	116
CCR2	199	199	200	200	285	291	245	245	178	190	104	116
CCR2	190	199	192	192	285	294	245	245	178	178	108	116
CCR2	199	199	200	200	285	291	245	245	174	174	112	116
CCR2	196	199	200	200	291	291	245	245	174	174	108	108
CCR2	199	199	188	200	285	291	245	245	174	182	104	116
CCR2	190	199	200	200	285	291	257	257	174	174	104	116
CCR2	190	199	200	200	291	291	245	257	174	182	104	108
CCR2	199	199	0	0	288	288	241	245	178	178	108	116
CCR2	196	196	200	200	291	291	241	245	174	182	112	116
CCR2	199	199	200	200	291	291	245	245	174	178	108	108
CCR2	184	199	192	192	285	294	257	257	174	178	108	112
CCR2	199	199	200	200	291	294	245	245	178	182	108	108
CCR2	196	199	192	192	294	294	245	261	174	174	108	108
CCR2	199	199	192	200	291	294	245	257	174	174	108	120
CCR2	199	199	200	200	291	291	245	245	174	174	108	116
CCR2	199	199	200	200	291	294	245	257	178	182	0	0
CCR2	196	196	200	200	291	291	245	245	178	182	100	108
CCR2	199	199	200	200	291	291	245	245	178	178	108	112
CCR2	199	199	188	192	285	291	245	245	178	182	108	108
CCR2	196	199	200	200	291	291	245	249	178	182	108	108
CCR2	190	199	188	200	285	294	245	245	190	190	108	120
CCR2	199	199	188	200	291	291	241	241	174	182	104	116
CCR2	184	196	200	200	294	294	245	245	174	190	108	108
CCR2	190	199	192	200	291	291	241	245	178	182	112	116
CCR2	196	199	200	200	291	291	241	245	174	182	116	120
CCR2	190	199	200	200	291	291	245	245	174	178	108	112
CCR2	199	199	200	200	291	294	245	245	182	190	108	120
CCR2	196	196	192	200	291	291	241	245	182	182	108	120
CCR2	199	199	200	200	291	294	245	257	178	178	108	116
CCR2	190	190	188	200	291	291	249	257	174	178	108	108
CCR3_10	196	199	200	200	285	291	241	245	182	182	104	108
CCR3_10	199	199	192	200	291	291	241	245	178	182	116	116
CCR3_10	199	199	192	192	291	294	241	245	0	0	104	116
CCR3_10	199	199	192	200	285	285	241	245	178	178	104	108
CCR3_10	199	199	192	200	291	291	241	241	0	0	108	116
CCR3_10	196	199	192	192	291	291	241	241	0	0	108	116
CCR3_10	199	199	192	192	285	291	245	245	174	174	104	108
CCR3_10	199	199	192	192	291	291	241	245	174	174	104	108
CCR3_10	196	199	200	200	291	294	241	245	182	182	108	112
CCR3_10	199	199	192	192	291	291	245	245	178	178	108	112
CCR3_10	196	199	188	200	291	291	245	257	178	178	108	108
CCR3_10	190	199	192	192	291	294	245	245	178	178	104	108
CCR3_10	199	199	192	192	291	291	245	245	178	182	100	112
CCR3_10	199	199	200	200	291	291	245	257	182	182	104	108
CCR3_10	184	199	184	184	291	291	245	257	0	0	104	116
CCR3_10	199	199	192	192	291	291	245	257	0	0	104	116
CCR3_20	196	199	192	200	285	285	245	245	178	178	116	120
CCR3_20	199	199	200	200	291	291	245	245	174	174	104	116
CCR3_20	190	196	188	200	291	294	241	245	178	178	108	108
CCR3_20	190	199	200	200	285	291	245	245	178	182	116	116
CCR3_20	184	199	192	192	291	294	241	245	178	182	104	108
CCR3_20	199	199	192	200	291	291	245	245	178	178	108	108
CCR3_20	199	199	200	200	291	291	241	245	174	178	104	104
CCR3_20	196	199	200	200	291	291	241	245	178	182	104	104
CCR3_20	199	199	200	200	291	291	241	245	178	178	108	108
CCR3_20	199	199	200	200	285	291	241	245	178	178	108	112
CCR3_20	199	199	200	200	291	294	241	245	178	182	108	108
CCR3_20	199	199	192	200	291	291	241	245	174	178	104	104
CCR3_20	184	199	192	200	291	291	241	245	178	178	104	112
CCR3_20	184	199	192	200	291	291	245	245	178	182	104	108
CCR3_20	190	199	192	200	291	291	241	245	178	182	104	116
CCR3_20	190	196	192	200	285	294	241	245	178	178	108	116
CCR3_30	190	199	192	196	291	291	241	241	182	182	108	116
CCR3_30	196	196	200	200	291	291	245	245	0	0	104	112
CCR3_30	199	199	196	200	285	291	241	257	174	178	108	108
CCR3_30	199	199	192	200	291	291	241	257	178	178	108	108
CCR3_30	196	196	192	196	291	291	241	257	174	178	108	116
CCR3_30	196	196	200	200	291	291	241	257	178	178	108	108
CCR3_30	199	199	196	196	285	291	241	257	178	182	104	104
CCR3_30	199	199	0	0	285	291	241	241	178	178	116	116
CCR3_30	199	199	200	200	285	285	241	241	0	0	104	108
CCR3_30	199	199	196	200	285	291	245	245	174	182	108	116
CCR3_30	199	199	188	200	285	285	245	257	178	182	104	108
CCR3_30	196	196	200	200	291	291	245	261	178	182	104	116
CCR3_30	199	199	200	200	291	291	245	257	178	182	108	108
CCR3_30	199	199	192	192	291	294	0	0	174	178	104	116
CCR3_30	199	199	192	200	291	294	241	241	178	182	108	120
CCR3_30	199	199	200	200	291	294	241	241	174	178	108	116
CCR3_40	196	196	192	196	285	291	241	257	0	0	108	120
CCR3_40	190	190	192	196	285	291	241	257	178	178	108	116
CCR3_40	190	190	192	196	285	291	241	257	182	182	108	116
CCR3_40	190	190	192	196	285	291	241	241	178	184	108	116
CCR3_40	190	190	192	196	285	291	241	257	178	178	108	116
CCR3_40	190	196	192	196	285	285	241	245	174	174	120	120
CCR3_40	196	196	192	200	285	291	241	241	178	178	120	120
CCR3_40	190	196	192	196	285	291	241	241	178	178	120	120
CCR3_40	190	196	192	196	285	291	241	245	178	178	120	120
CCR3_40	190	196	192	192	285	291	241	241	178	178	108	116
CCR3_40	190	190	192	196	285	291	241	245	178	178	104	112
CCR3_40	190	190	192	196	285	291	241	241	178	178	108	116
CCR3_40	190	196	192	196	285	291	241	241	178	178	116	116
CCR3_40	190	190	196	196	285	291	241	241	194	194	120	120
CCR3_40	190	190	192	196	285	291	241	245	0	0	120	120
CCR3_40	190	190	192	196	285	291	237	241	190	190	120	120
CCR3_50	196	196	200	200	291	291	241	245	186	190	104	116
CCR3_50	196	196	200	200	291	291	241	241	190	190	104	116
CCR3_50	196	196	200	200	291	291	241	241	0	0	104	116
CCR3_50	196	196	200	200	291	291	241	241	190	190	104	116
CCR3_50	190	199	200	200	291	291	241	245	190	190	104	116
CCR3_50	199	199	200	200	291	291	241	241	190	190	104	116
CCR3_50	196	196	200	200	291	291	241	241	190	190	104	116
CCR3_50	196	196	200	200	291	291	241	241	0	0	104	116
CCR3_50	196	196	200	200	291	291	241	245	186	190	104	116
CCR3_50	196	196	200	200	291	291	241	241	190	190	104	116
CCR3_50	196	196	200	200	291	291	241	241	190	190	104	116
CCR3_50	196	196	196	200	291	291	241	241	190	190	104	116
CCR3_50	196	196	200	200	291	291	237	237	190	190	104	116
CCR3_50	196	196	196	200	291	291	241	241	190	190	104	116
CCR3_50	196	196	192	196	291	291	241	241	190	190	104	116
CCR3_50	196	196	192	196	291	291	241	241	0	0	104	116
CCR3_60	196	199	192	192	285	291	241	245	182	182	108	120
CCR3_60	190	196	192	192	285	285	241	245	178	182	112	116
CCR3_60	190	196	192	192	285	291	245	257	178	178	108	112
CCR3_60	190	196	192	192	285	285	245	257	174	182	108	108
CCR3_60	199	199	192	192	285	285	241	245	0	0	100	120
CCR3_60	196	199	192	192	285	285	241	245	178	182	108	116
CCR3_60	196	199	192	192	285	291	245	257	174	182	108	108
CCR3_60	0	0	192	192	285	285	241	245	174	174	108	108
CCR3_60	196	199	192	192	285	285	241	249	178	182	108	108
CCR3_60	190	190	192	192	285	291	245	249	182	182	108	112
CCR3_60	196	196	192	192	285	285	241	245	178	182	108	108
CCR3_60	196	196	192	192	285	285	241	245	182	190	108	108
CCR3_60	196	196	192	192	291	291	241	241	178	190	108	108
CCR3_60	196	196	184	194	285	285	241	249	178	182	108	108
CCR3_60	196	196	192	200	291	291	241	249	178	190	108	108
CCR3_60	196	196	192	200	291	291	241	249	178	190	108	108
CCR4	196	196	188	192	285	306	245	257	174	178	108	108
CCR4	196	199	200	200	291	291	245	245	174	182	108	116
CCR4	199	199	192	192	291	291	245	249	174	178	116	120
CCR4	196	199	192	192	291	291	241	257	178	178	112	120
CCR4	196	199	188	200	291	291	245	245	174	174	108	120
CCR4	190	190	200	200	291	306	245	257	178	178	108	108
CCR4	199	199	200	200	291	291	245	245	174	182	104	104
CCR4	199	199	200	200	291	306	245	245	174	182	116	116
CCR4	184	199	200	200	291	306	241	245	174	178	108	116
CCR4	199	199	200	200	285	306	241	245	174	178	116	120
CCR4	184	199	192	200	291	291	245	257	174	178	108	116
CCR4	190	199	188	192	291	291	245	257	174	178	108	108
CCR4	196	199	192	192	291	291	245	257	174	178	104	116
CCR4	190	190	192	192	291	306	245	245	174	182	104	116
CCR4	184	190	200	200	291	306	245	257	178	182	104	116
CCR4	196	199	192	200	291	291	241	257	178	178	100	108
CCR4	199	199	192	200	291	291	245	257	174	174	108	116
CCR4	199	199	188	192	291	291	245	249	174	178	112	116
CCR4	199	199	192	200	285	291	245	257	178	182	104	108
CCR4	196	199	200	200	291	291	245	261	174	174	104	116
CCR4	190	199	200	200	291	291	245	257	174	178	108	120
CCR4	190	190	192	200	291	291	245	257	174	182	108	116
CCR4	199	199	188	200	291	291	245	257	174	178	108	116
CCR4	196	199	192	200	291	306	245	257	174	178	108	120
CCR4	190	199	200	200	285	294	245	245	174	178	104	104
CCR4	190	190	200	200	291	291	245	257	178	178	108	116
CCR4	199	199	200	200	291	291	245	245	0	0	0	0
CCR4	190	199	200	200	291	291	245	257	174	174	108	136
CCR4	199	199	200	200	285	291	245	245	178	182	112	116
CCR4	199	199	200	200	291	291	245	245	178	182	108	116
CCR5	199	199	188	188	291	291	241	241	174	178	108	116
CCR5	199	199	200	200	291	306	245	257	174	182	108	120
CCR5	199	199	200	200	285	291	245	249	178	182	116	120
CCR5	199	202	200	200	291	291	245	249	174	178	108	108
CCR5	190	199	200	200	285	306	245	245	178	182	108	108
CCR5	196	199	200	200	285	291	245	257	178	182	108	116
CCR5	199	199	200	200	294	294	245	245	174	182	112	116
CCR5	190	199	200	200	285	291	245	245	174	178	108	108
CCR5	199	202	192	200	288	294	241	245	174	178	108	108
CCR5	199	202	200	200	294	294	245	245	174	182	108	108
CCR5	196	199	200	200	285	294	241	245	174	182	104	116
CCR5	196	196	200	200	291	291	245	257	178	182	112	112
CCR5	196	196	192	192	291	291	245	245	174	174	112	116
CCR5	184	199	200	200	294	294	245	245	174	178	104	116
CCR5	196	199	192	200	291	294	241	245	178	182	104	116
CCR5	190	199	192	200	291	291	245	245	174	174	104	116
CCR5	190	199	200	200	285	291	245	257	174	174	104	108
CCR5	199	199	200	200	291	291	245	245	174	174	108	108
CCR5	196	199	200	200	291	291	245	261	194	194	104	112
CCR5	199	199	200	200	285	291	245	245	174	178	108	116
CCR5	184	193	200	200	285	291	245	245	0	0	104	112
CCR5	184	199	192	200	291	291	245	245	174	178	104	108
CCR5	184	199	200	200	285	285	245	245	174	178	100	112
CCR5	184	199	200	200	291	291	245	249	174	182	104	112
CCR5	199	199	200	200	285	291	245	245	178	178	104	116
CCR5	199	199	200	200	279	285	245	257	174	182	104	112
CCR5	199	199	200	200	291	294	245	245	174	182	104	108
CCR5	196	202	200	200	291	291	245	261	0	0	108	108
CCR5	190	199	200	200	291	291	245	261	0	0	140	140
CCR5	190	199	192	200	285	291	245	261	174	178	116	120
CCR6	190	199	200	200	291	291	245	249	170	182	108	108
CCR6	199	199	188	200	285	294	245	245	174	174	108	112
CCR6	199	199	200	200	291	291	245	261	174	178	112	116
CCR6	199	199	192	200	291	291	245	257	174	178	104	108
CCR6	190	199	200	200	291	294	245	245	174	178	108	116
CCR6	196	199	192	200	285	291	245	257	174	178	104	116
CCR6	196	199	200	200	285	291	245	261	182	190	108	116
CCR6	190	190	200	204	291	291	257	257	174	182	108	120
CCR6	190	199	192	200	291	291	245	257	174	186	108	112
CCR6	190	199	192	192	291	291	245	245	182	182	108	116
CCR6	190	190	188	200	285	291	245	245	178	178	108	108
CCR6	190	199	192	192	285	291	249	257	178	182	108	112
CCR6	190	199	192	200	285	291	245	249	174	182	108	116
CCR6	199	199	200	200	291	294	245	249	178	178	108	116
CCR6	199	199	188	200	291	291	245	245	174	174	104	116
CCR6	190	199	200	200	291	291	245	245	174	174	116	116
CCR6	190	199	192	200	291	291	245	257	0	0	112	116
CCR6	196	199	200	200	291	291	245	245	182	186	112	120
CCR6	199	199	200	200	291	291	245	257	174	174	108	112
CCR6	199	199	200	200	285	285	245	257	174	178	108	108
CCR6	199	199	200	200	291	291	245	261	174	178	108	116
CCR6	199	199	200	200	291	291	245	261	182	182	104	112
CCR6	199	199	200	200	291	294	245	245	178	182	108	112
CCR6	196	199	200	200	291	291	245	245	182	182	108	108
CCR6	199	199	200	200	291	291	245	249	178	182	116	116
CCR6	199	199	200	200	285	291	245	245	182	182	108	108
CCR6	199	199	188	200	291	291	245	245	174	178	108	116
CCR6	199	199	0	0	0	0	0	0	174	182	116	116
CCR6	190	196	192	200	291	291	245	257	182	182	116	116
CCR6	190	199	200	200	291	291	245	257	174	186	108	116
CCR7	190	196	192	200	291	291	241	245	174	178	116	116
CCR7	199	199	200	200	285	291	245	257	174	178	108	112
CCR7	190	199	192	200	291	291	257	257	178	178	108	112
CCR7	190	199	200	200	291	291	245	245	174	174	104	108
CCR7	190	190	200	208	285	285	245	261	174	174	104	116
CCR7	184	199	200	200	285	291	245	257	174	178	108	116
CCR7	199	199	200	200	291	291	245	245	174	174	108	108
CCR7	190	199	200	200	285	291	245	245	178	182	108	116
CCR7	190	196	200	204	285	294	245	245	174	178	108	108
CCR7	190	199	0	0	285	291	0	0	174	178	104	104
CCR7	199	199	200	200	291	291	245	245	174	178	120	120
CCR7	199	199	192	200	291	291	245	245	174	174	116	116
CCR7	190	190	200	200	291	291	245	245	0	0	108	108
CCR7	190	199	196	200	282	288	237	245	198	202	104	108
CCR7	199	199	192	200	291	291	245	257	198	198	112	112
CCR7	199	199	200	200	285	285	241	245	174	178	108	112
CCR7	190	199	200	200	285	291	245	245	174	174	112	120
CCR7	190	199	200	200	285	291	245	245	170	178	108	120
CCR7	193	199	200	200	291	291	245	257	190	190	104	104
CCR7	190	199	192	200	291	291	245	245	174	182	108	112
CCR7	199	199	200	200	285	285	249	257	178	178	104	104
CCR7	190	199	200	200	291	291	245	257	178	178	116	120
CCR7	196	199	192	200	285	291	245	249	174	190	108	116
CCR7	199	199	200	200	285	291	245	245	174	190	108	112
CCR7	190	199	192	200	291	306	245	245	174	178	104	112
CCR8	196	196	192	200	285	291	245	245	178	178	108	116
CCR8	202	202	188	192	291	291	241	245	178	182	104	116
CCR8	196	199	200	200	285	291	245	245	174	174	108	116
CCR8	199	199	200	200	291	291	245	261	174	174	116	116
CCR8	187	202	200	200	291	294	245	257	178	182	108	116
CCR8	196	196	192	208	291	294	245	257	174	178	108	108
CCR8	190	202	200	200	285	291	245	257	178	178	108	108
CCR8	199	199	0	0	288	291	245	249	178	182	108	116
CCR8	199	199	200	200	285	285	245	257	178	178	104	108
CCR8	190	199	200	200	291	291	245	257	174	182	104	112
CCR8	199	199	200	200	285	291	257	257	174	182	104	116
CCR8	199	202	200	200	291	291	257	257	174	178	108	108
CCR8	190	199	192	200	291	294	245	249	178	182	108	108
CCR8	196	199	200	200	285	288	245	245	178	182	108	116
CCR8	196	199	192	192	291	291	245	257	178	182	108	108
CCR8	196	199	200	200	291	294	245	245	174	182	108	116
CCR8	196	199	200	200	285	294	245	261	174	182	108	108
CCR8	199	199	200	200	285	291	241	257	178	178	108	120
CCR8	190	199	200	200	291	291	245	245	178	182	108	108
CCR8	184	199	200	200	291	291	257	257	174	178	108	116
CCR8	196	199	200	204	291	294	245	257	178	178	108	108
CCR8	199	202	200	200	291	291	257	257	182	190	104	108
CCR8	196	196	192	200	285	294	245	261	174	178	104	104
CCR8	190	199	192	200	291	291	245	257	174	174	108	116
CCR8	190	199	200	200	291	306	257	261	174	174	108	108
CCR8	199	199	200	200	291	291	245	257	174	174	108	116
CCR8	199	199	200	200	291	291	245	245	174	174	104	108
CCR8	196	202	200	200	294	306	245	245	174	178	108	108
CCR8	190	190	200	200	291	291	237	241	174	178	108	120
CCR8	199	199	192	200	291	291	245	257	178	178	108	116
